# Supplementary material for: Assembly-Induced Emission Enhancement in Glutathione-Capped Bimetallic Gold and Copper Nanoclusters by Al3+ Ions and Further Application in Myricetin Determination
Source: MDPI journal article supplement (doi:10.3390/molecules28020758), 2023-01-12
Supplement: s1 [file s1]

# Assembly-induced Emission Enhancement of Glutathione Capped Bimetallic Gold and Copper Nanoclusters by Al<sup>3+</sup> Ions and Further Application in Myricetin Determination

Hao-Jie Bai <sup>1,2</sup>, De-Yan Qi <sup>1,2</sup>, Hong-Wei Li <sup>1,2</sup>, and Yuqing Wu <sup>1,2,\*</sup>

<sup>1</sup> State Key Laboratory of Supramolecular Structure and Materials, College of Chemistry, Jilin University, 2699 Qianjin Street, Changchun 130012, P. R. China

<sup>2</sup> Institute of Theoretical Chemistry, College of Chemistry, Jilin University, 2 Liutiao Road, Changchun 130023, P. R. China

\* Correspondence: yqw@jlu.edu.cn

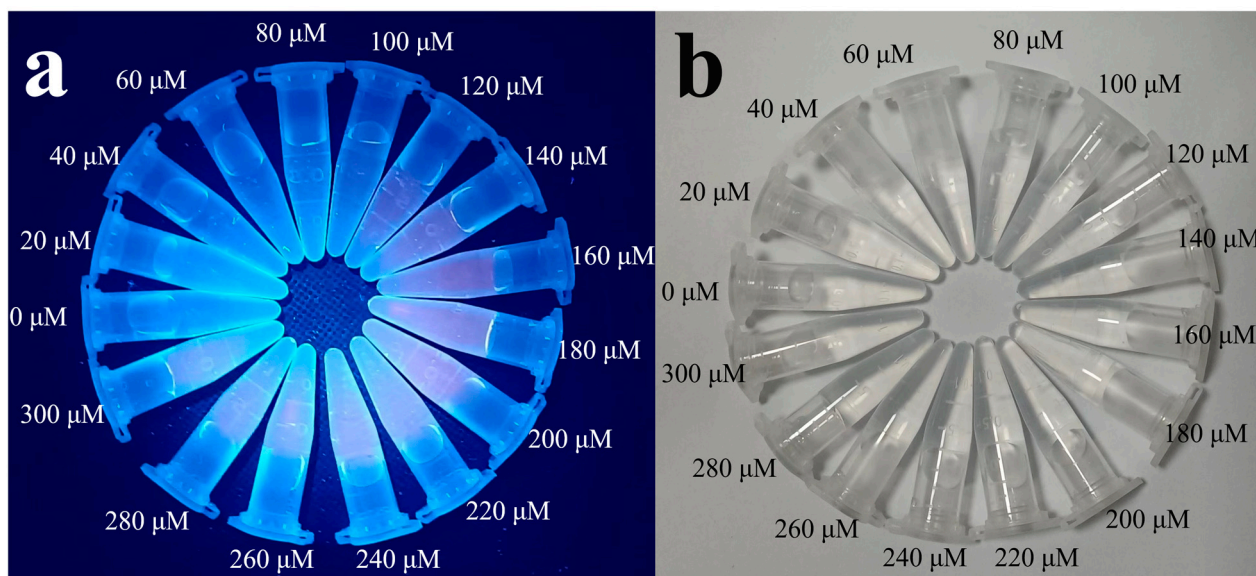

**Figure S1.** The photograph of AuCuNC@GSH (0.050 mg·L<sup>-1</sup>) in the presence of different amounts of Al<sup>3+</sup> (0 – 300 μM) in MES-NaOH buffer (pH = 6.0) under (a) UV light (365 nm) and (b) sunlight.

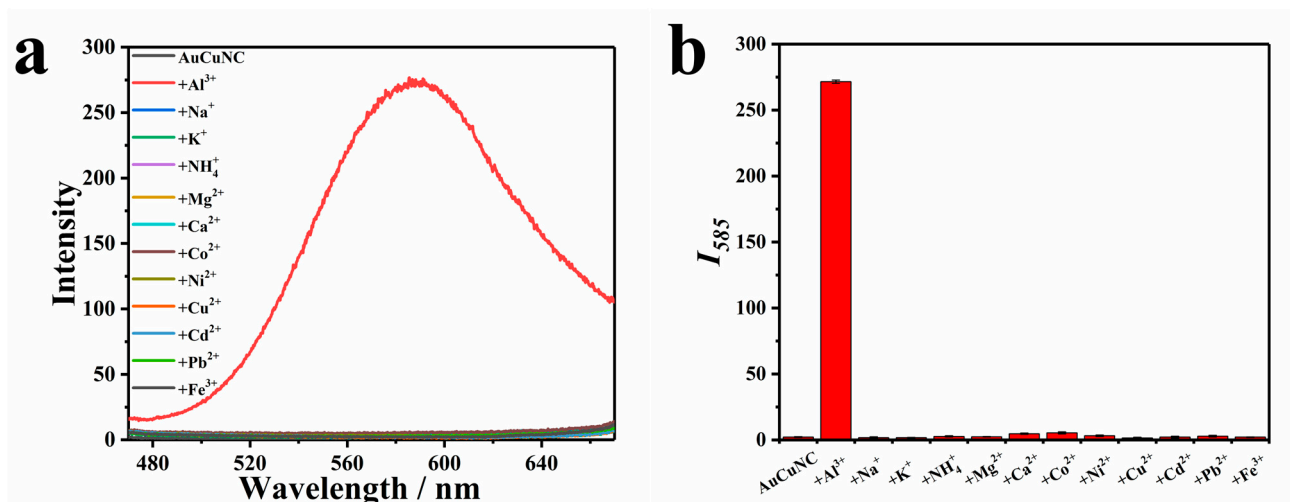

**Figure S2.** (a) Fluorescence spectra of AuCuNC@GSH ( $0.050 \text{ mg}\cdot\text{L}^{-1}$ ) in the absence and presence of different metal ions ( $200 \text{ }\mu\text{M}$ ) in MES-NaOH buffer ( $\text{pH} = 6.0$ ); (b) the related emission changes at 585 nm ( $\lambda_{\text{ex}} = 350 \text{ nm}$ ).

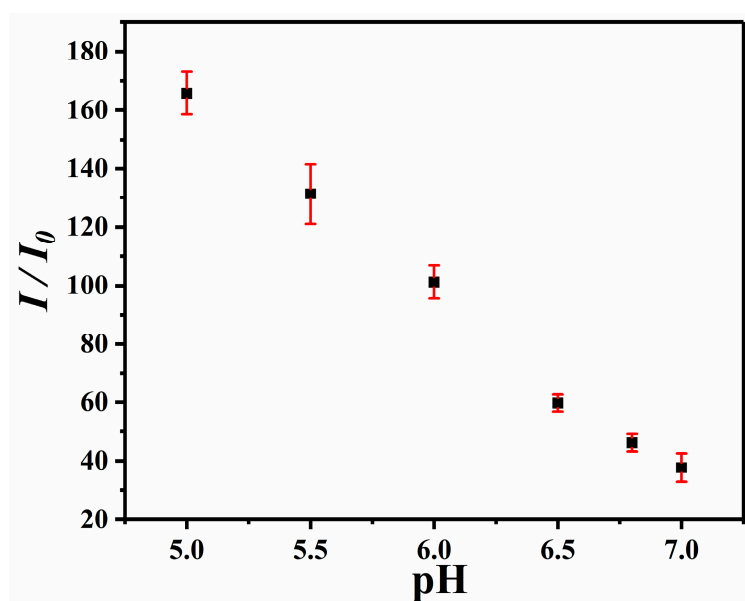

**Figure S3.** The emission intensity changes of AuCuNC@GSH ( $0.050 \text{ mg}\cdot\text{L}^{-1}$ ) to  $\text{Al}^{3+}$  ( $200 \text{ }\mu\text{M}$ ) at different pH (5.0, 5.5, 6.0, 6.5, 6.8 and 7.0), respectively.

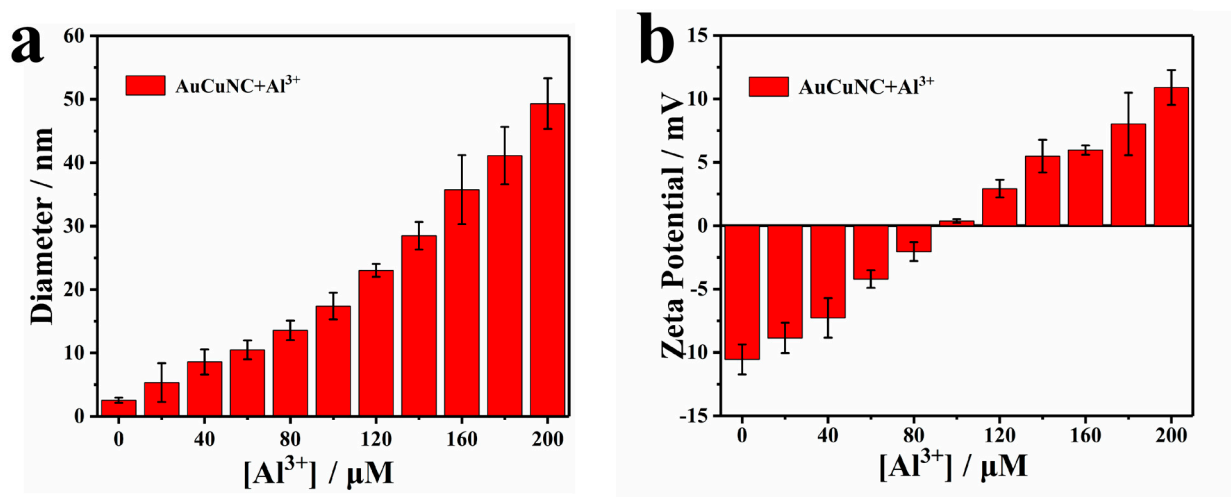

**Figure S4.** (a) Dynamic light scattering (DLS) and (b) Zeta-potential changes of AuCuNC@GSH ( $0.050 \text{ mg}\cdot\text{L}^{-1}$ ) in the presence of different amounts of  $Al^{3+}$  (0 – 200  $\mu M$ ) in MES-NaOH buffer (pH = 6.0).

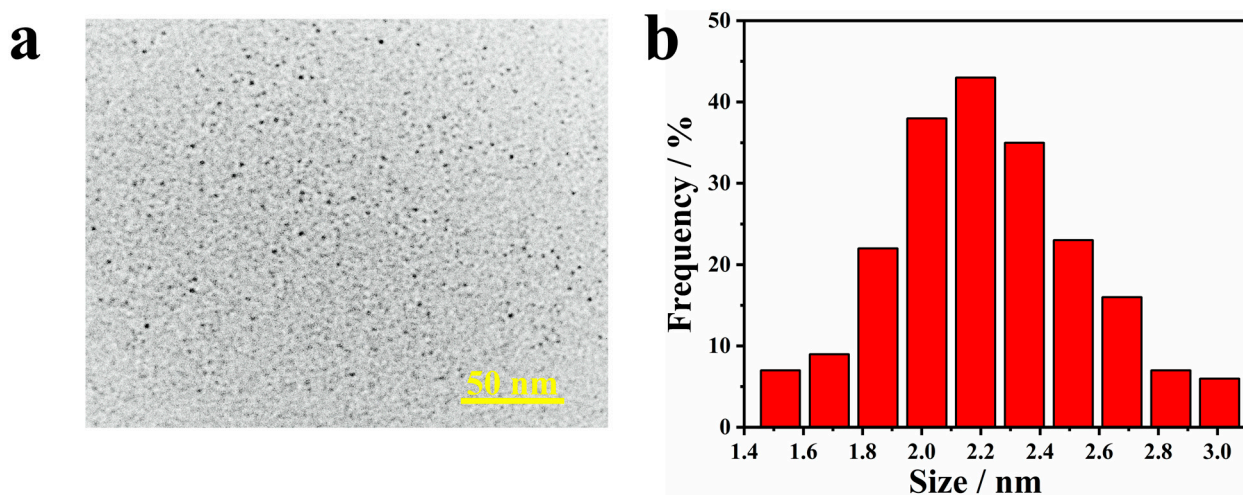

**Figure S5.** (a) Typical TEM image and (b) particle size distribution statistics of AuCuNC@GSH.

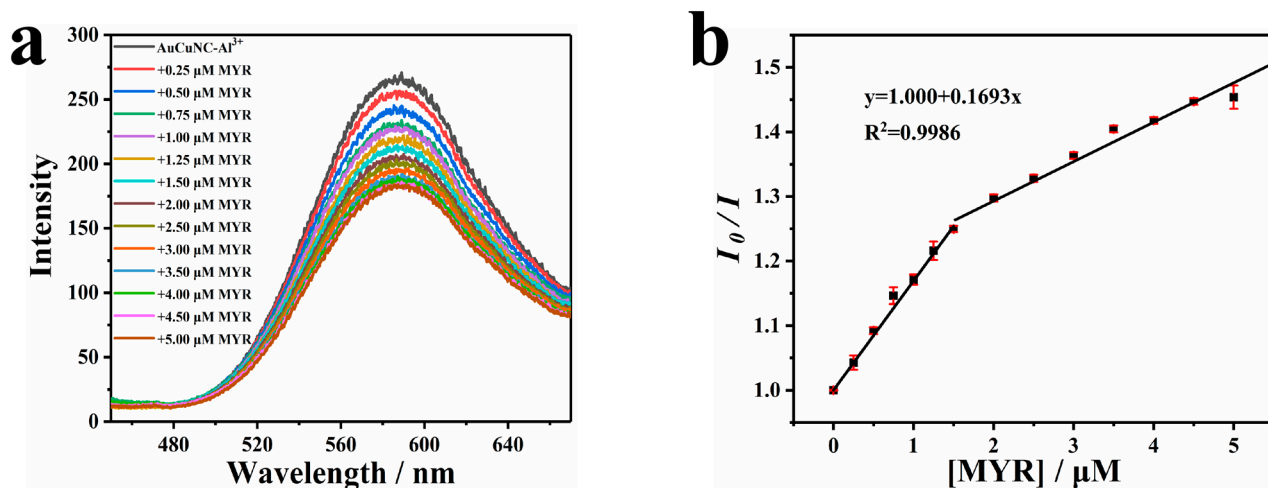

**Figure S6.** (a) Fluorescence spectra of AuCuNC-Al<sup>3+</sup> (0.050 mg·L<sup>-1</sup>, 200 μM) in the absence and presence of different amounts of myricetin (MYR) in MES-NaOH buffer (pH = 6.0); (b) the corresponding intensity ratio changes at 585 nm (the initial intensity over the measured value,  $\lambda_{\text{ex}}$  = 350 nm).

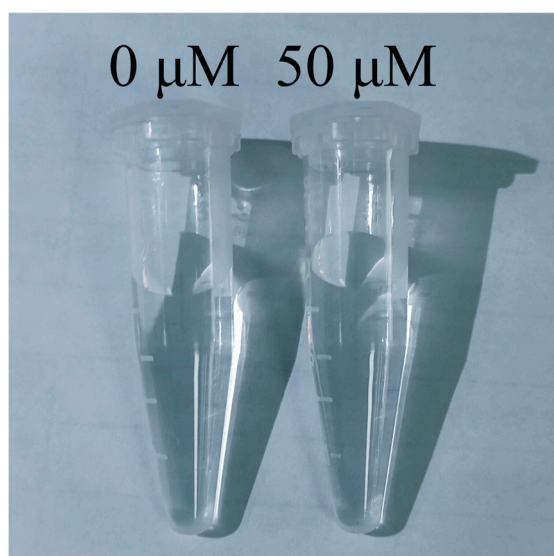

**Figure S7.** The photograph of myricetin in MES-NaOH buffer (pH = 6.0) under sunlight.

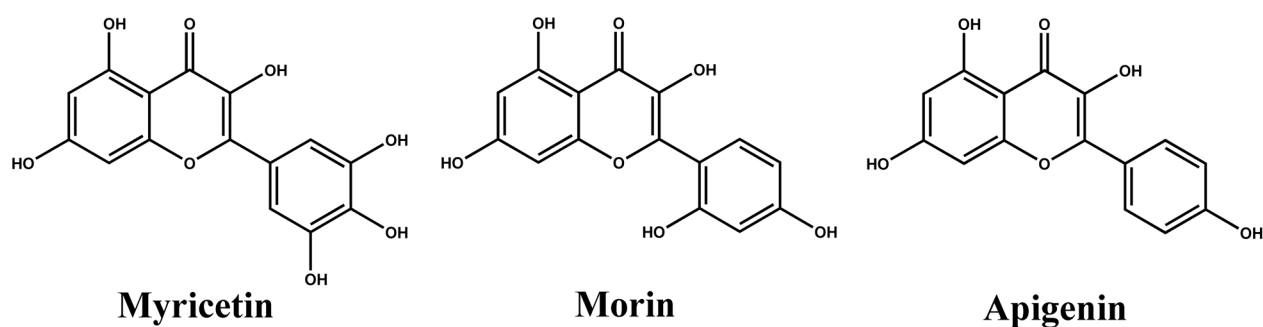

**Figure S8.** Chemical structures of myricetin, morin and apigenin, respectively.

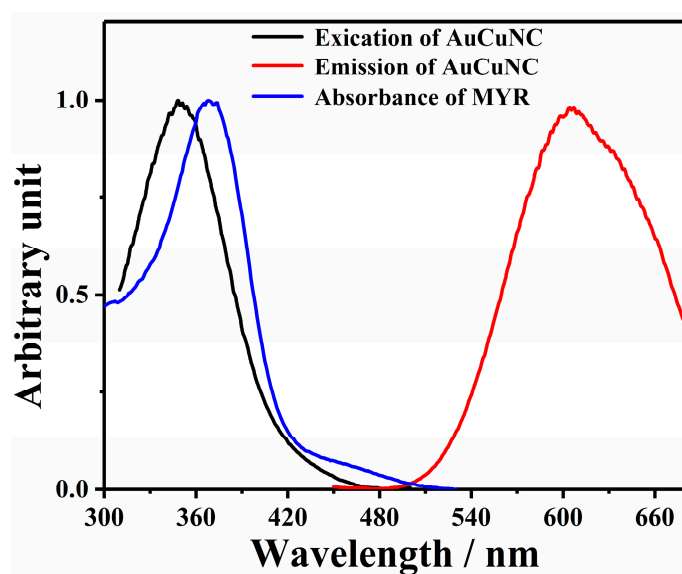

**Figure S9.** Fluorescence excitation (black) and emission (red) spectra of AuCuNCs- $\text{Al}^{3+}$ , and the UV-Vis absorption (blue) spectrum of myricetin (MYR) in MES-NaOH buffer (pH = 6.0).

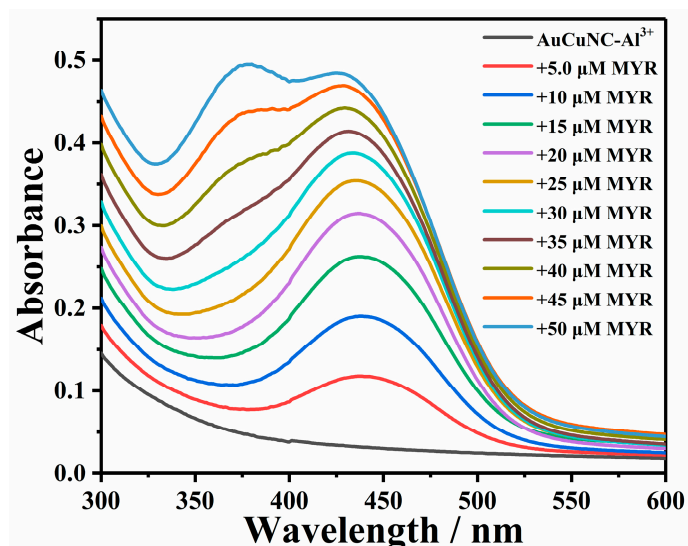

**Figure S10.** UV-Vis absorption spectra of AuCuNC-Al<sup>3+</sup> (0.050 mg·L<sup>-1</sup>, 200 μM) in the presence of different amounts of myricetin (MYR; 0 – 50 μM).

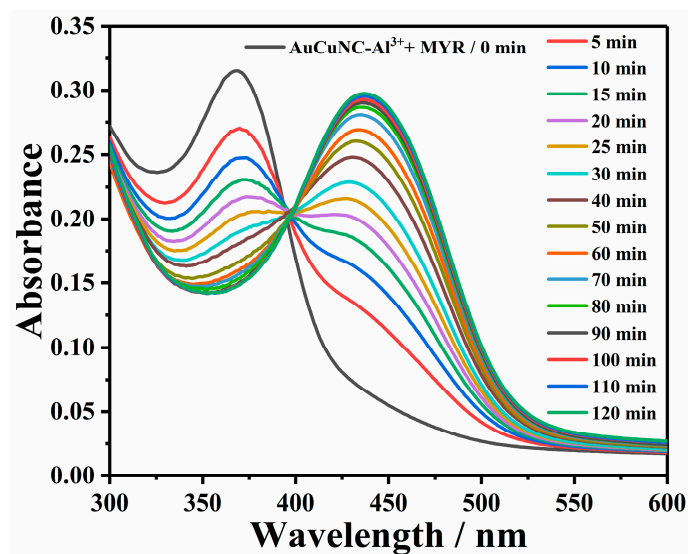

**Figure S11.** Time-dependent UV-Vis absorption spectra of AuCuNC-Al<sup>3+</sup> (0.050 mg·L<sup>-1</sup>, 200 μM) in the presence of myricetin (MYR, 20 μM).

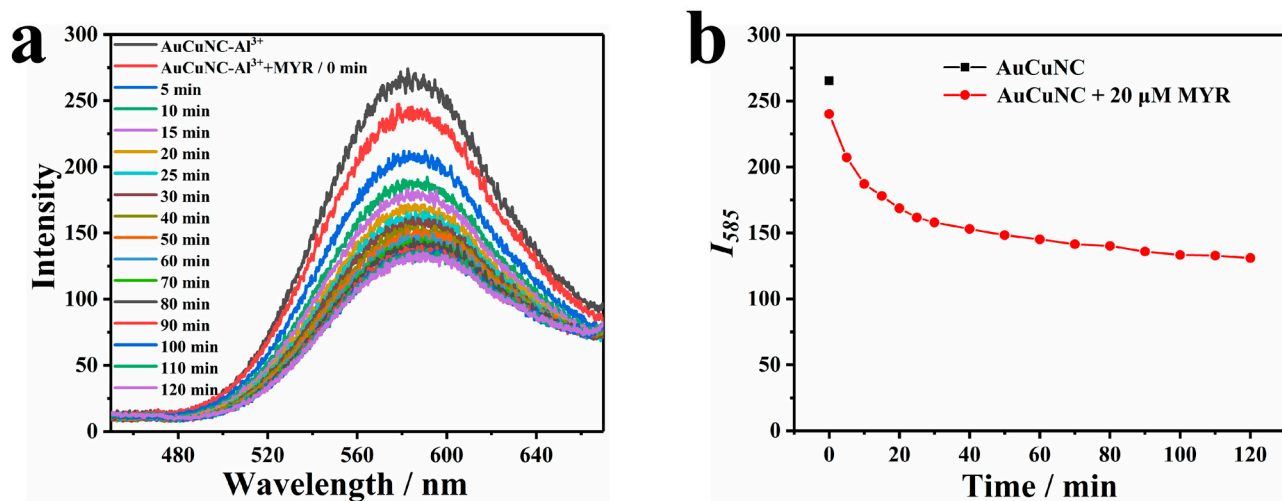

**Figure S12.** (a) Time-dependent fluorescence spectra and (b) corresponding intensity changes of AuCuNC-Al<sup>3+</sup> (0.050 mg·L<sup>-1</sup>, 200 μM) in the presence of myricetin (MYR, 20 μM).

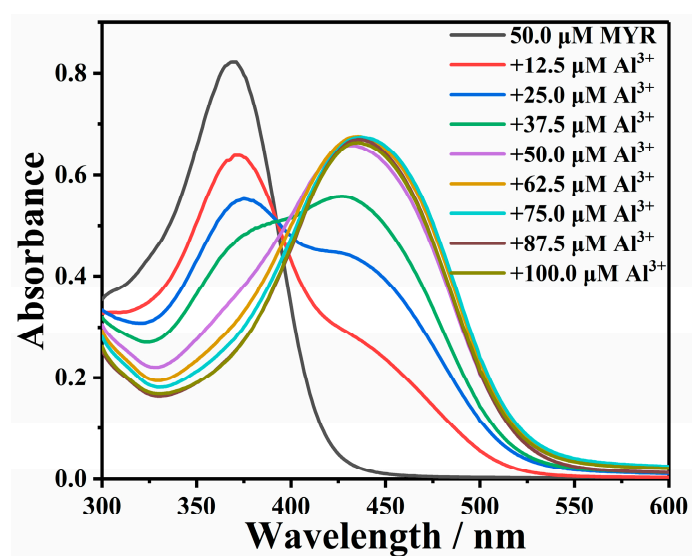

**Figure S13.** UV-Vis absorption spectra of myricetin (50 μM) in the presence of different amounts of Al<sup>3+</sup> (0 – 50 μM).



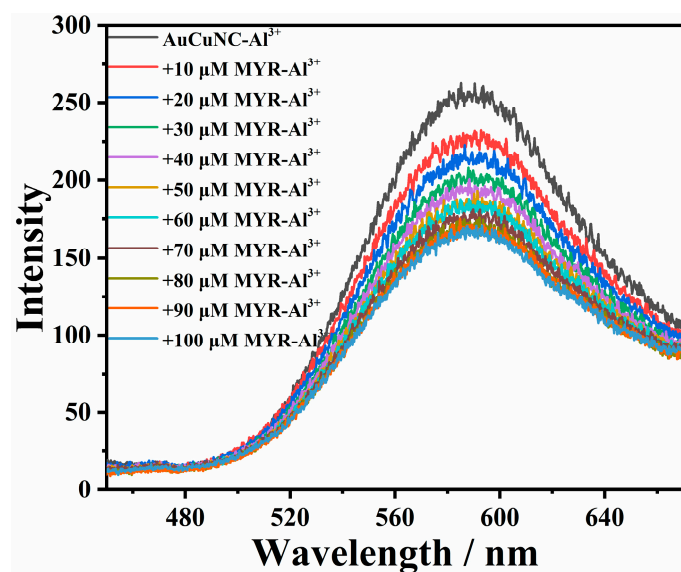

**Figure S14.** Fluorescence spectra of AuCuNC-Al<sup>3+</sup> (0.050 mg·L<sup>-1</sup>, 200 μM) in the presence of myricetin-Al<sup>3+</sup> (1:1; 0 – 100 μM).

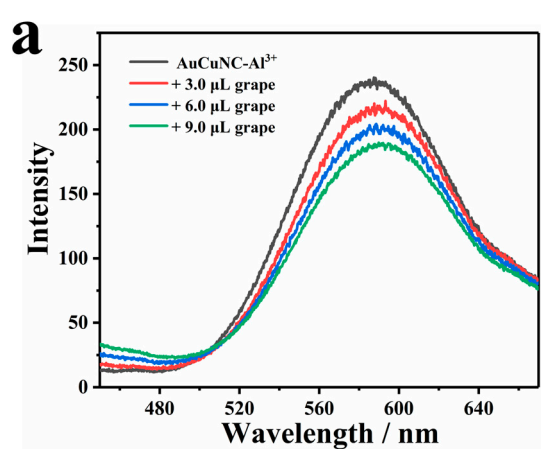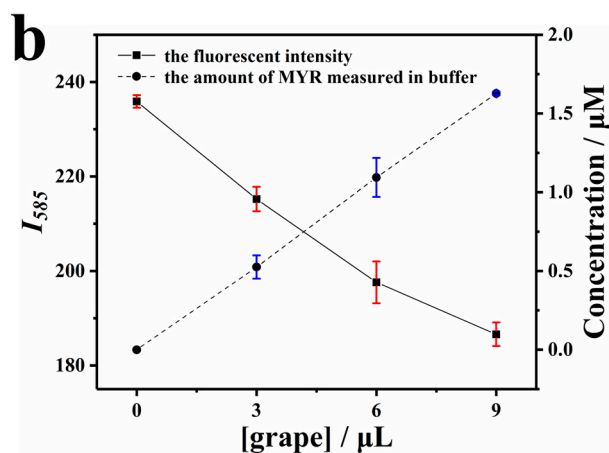

**Figure S15.** (a) Fluorescence spectra and (b) the emission intensity changes of AuCuNC-Al<sup>3+</sup> in the presence of different volume of grape juice (0 – 9 μL).



**Table S1.** Comparison of the analytical performance of different methodologies towards myricetin determination.

| Materials                              | Methodology     | LOD            | Linear range     | Ref.         |
|----------------------------------------|-----------------|----------------|------------------|--------------|
| Carbon quantum dots                    | fluorescence    | 18.4 nM        | 1–80 $\mu$ M     | S1           |
| Imprinted APBA-functionalized CdTe QDs | fluorescence    | 0.08 $\mu$ M   | 0.30–40 $\mu$ M  | S2           |
| Walnut septum sample                   | HPLC-DAD        | 0.24 $\mu$ g/g | 1–10 $\mu$ g/g   | S3           |
| Ternary nanocomposite                  | electrochemical | 3.0 nM         | 0.01–15 $\mu$ M  | S4           |
| Ternary nanocomposite film             | electrochemical | 67 nM          | 1–110 $\mu$ M    | S5           |
| Ternary nanocomposite                  | electrochemical | 0.01 $\mu$ M   | 0.050–50 $\mu$ M | S6           |
| AuCuNC-Al <sup>3+</sup>                | fluorescence    | 8.7 nM         | 1.5–50 $\mu$ M   | Present work |

**Table S2.** The parameters of the present method and standard method (HPLC) for myricetin determination in grape samples.

| Sample | HPLC (mM) | AuCuNC-Al <sup>3+</sup> (mM) | Added (mM) | Found (mM) | Recovery (%) | RSD (%)<br>n = 3 |
|--------|-----------|------------------------------|------------|------------|--------------|------------------|
|        |           |                              | 0.50       | 0.625      | 98.48        | 3.631            |
| grape  | 0.180     | 0.181                        | 1.0        | 1.153      | 102.02       | 6.232            |
|        |           |                              | 2.0        | 2.087      | 97.72        | 3.673            |

## Reference

- S1** Liu, L.; Mi, Z.; Guo, Z.; Wang, J.; Feng, F. A label-free fluorescent sensor based on carbon quantum dots with enhanced sensitive for the determination of myricetin in real samples. *Microchem. J.* **2020**, *157*, 104956.
- S2** Zhang, Y.; Tian, X.; Zhang, Z.; Tang, N.; Ding, Y.; Wang, Y.; Li, D. Boronate affinity-based template-immobilization surface imprinted quantum dots as fluorescent nanosensors for selective and sensitive detection of myricetin. *Spectrochim. Acta A.* **2022**, *272*, 121023.

- S3** Kalogiouri, N. P.; Samanidou, V. F. A Validated Ultrasound-Assisted Extraction Coupled with SPE-HPLC-DAD for the Determination of Flavonoids in By-Products of Plant Origin: An Application Study for the Valorization of the Walnut Septum Membrane. *Molecule*. **2021**, *26*, 6418.
- S4** Liu, C.; Huang, J.; Wang, L. Electrochemical synthesis of a nanocomposite consisting of carboxy-modified multi-walled carbon nanotubes, polythionine and platinum nanoparticles for simultaneous voltammetric determination of myricetin and rutin. *Microchim. Acta* **2018**, *185*, 414.
- S5** Xing, R.; Tong, L.; Zhao, X.; Liu, H.; Ma, P.; Zhao, J.; Liu, X.; Liu, S. Rapid and sensitive electrochemical detection of myricetin based on polyoxometalates/SnO<sub>2</sub>/gold nanoparticles ternary nanocomposite film electrode. *Sensor. Actuat. B-Chem.* **2019**, *283*, 35–41.
- S6** Tursynbolat, S.; Bakytkarim, Y.; Huang, J.; Wang, L. Highly sensitive simultaneous electrochemical determination of myricetin and rutin via solid phase extraction on a ternary Pt@r-GO@MWCNTs nanocomposite. *J. Pharm. Anal.* **2019**, *9*, 358–366.
